# Supplementary material for: Matrix Effect of Diverse Biological Samples Extracted with Different Extraction Ratios on the Detection of β-N-Methylamino-L-Alanine by Two Common LC-MS/MS Analysis Methods
Source: MDPI journal article supplement (doi:10.3390/toxins14060387), 2022-06-02
Supplement: s1 [file s1]

# Supplementary Materials: Matrix Effect of Diverse Biological Samples Extracted with Different Extraction Ratios on the Detection of $\beta$ -N-methylamino-L-alanine by Two Common LC-MS/MS Analysis Methods

Peng Zhao, Jiangbing Qiu, Aifeng Li, Guowang Yan, Min Li and Ying Ji

**Table S1.** The MRM transitions used for detection of BMAA and its isomers.

| Methods | Precursor ion ( <i>m/z</i> ) | Product ion ( <i>m/z</i> ) | DP (V) | CE (eV) |
|---------|------------------------------|----------------------------|--------|---------|
| HILIC   | 119                          | 102                        | 30     | 13      |
|         | 119                          | 101                        | 30     | 11      |
|         | 119                          | 88                         | 30     | 17      |
|         | 119                          | 56                         | 30     | 24      |
|         | 119                          | 44                         | 30     | 24      |
| AQC     | 459                          | 119                        | 30     | 25      |
|         | 459                          | 188                        | 30     | 25      |
|         | 459                          | 214                        | 30     | 40      |
|         | 459                          | 258                        | 30     | 30      |
|         | 459                          | 289                        | 30     | 25      |
|         | 459                          | 171                        | 30     | 40      |

**Table S2.** The MRM transitions used for detection of amino acids.

| Methods       | Precursor ion ( <i>m/z</i> ) | Product ion ( <i>m/z</i> ) | DP (V) | CE (eV) |
|---------------|------------------------------|----------------------------|--------|---------|
| Glycine       | 76                           | 30                         | 20     | 10      |
|               | 117                          | 76                         | 20     | 10      |
| Alanine       | 90                           | 44                         | 40     | 15      |
|               | 90                           | 45                         | 20     | 45      |
| Serine        | 106                          | 60                         | 40     | 15      |
|               | 106                          | 42                         | 40     | 30      |
| Proline       | 116                          | 70                         | 40     | 20      |
|               | 157                          | 70                         | 20     | 40      |
| Valine        | 118                          | 72                         | 40     | 20      |
|               | 118                          | 55                         | 40     | 30      |
| Threonine     | 120                          | 74                         | 40     | 15      |
|               | 120                          | 56                         | 40     | 25      |
| Cysteine      | 122                          | 59                         | 40     | 35      |
|               | 163                          | 122                        | 20     | 10      |
| Isoleucine    | 132                          | 69                         | 40     | 30      |
|               | 132                          | 86                         | 40     | 15      |
| Leucine       | 132                          | 86                         | 40     | 15      |
|               | 132                          | 44                         | 40     | 35      |
| Asparagine    | 133                          | 87                         | 30     | 12      |
|               | 133                          | 74                         | 30     | 16      |
| Aspartic acid | 134                          | 74                         | 30     | 15      |

|               |     |     |    |    |
|---------------|-----|-----|----|----|
|               | 134 | 88  | 30 | 18 |
| Glutamine     | 147 | 84  | 40 | 20 |
|               | 147 | 130 | 40 | 15 |
| Lysine        | 147 | 67  | 40 | 14 |
|               | 147 | 84  | 40 | 30 |
| Glutamic amid | 148 | 84  | 30 | 16 |
|               | 148 | 56  | 30 | 28 |
| Methionine    | 150 | 61  | 40 | 35 |
|               | 150 | 56  | 40 | 20 |
| Histidine     | 156 | 110 | 40 | 20 |
|               | 156 | 82  | 40 | 45 |
| Phenylalanine | 166 | 120 | 40 | 15 |
|               | 166 | 103 | 40 | 40 |
| Arginine      | 175 | 70  | 20 | 35 |
|               | 175 | 60  | 20 | 15 |
| Tyrosine      | 182 | 91  | 40 | 25 |
|               | 182 | 136 | 40 | 30 |
| Tryptophan    | 205 | 146 | 40 | 20 |
|               | 205 | 118 | 40 | 35 |

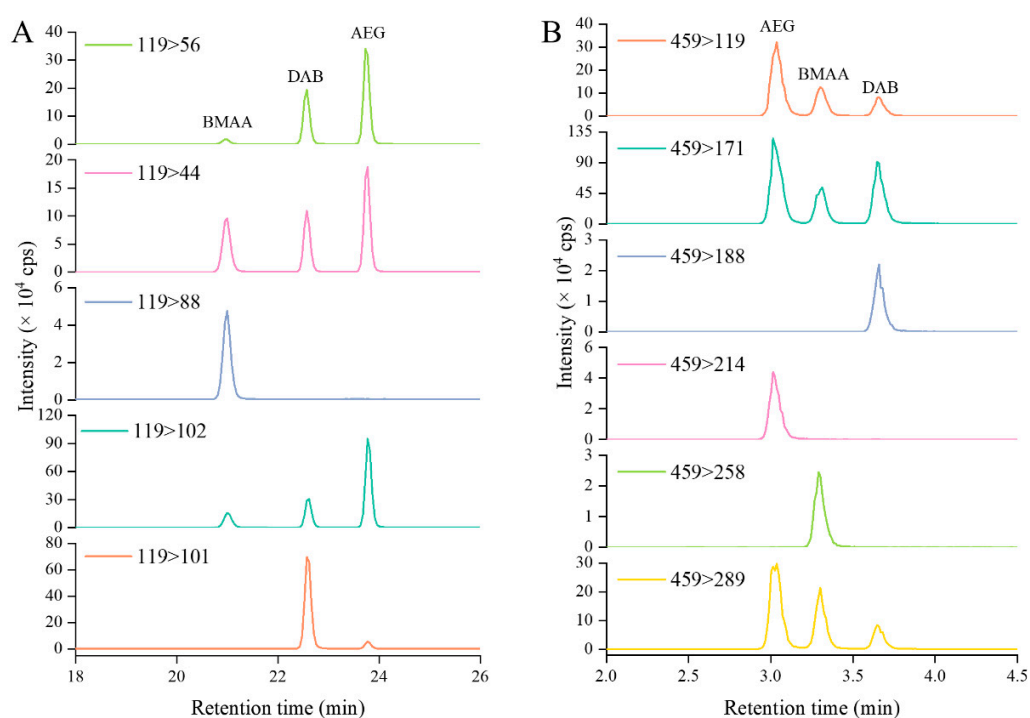

**Figure S1.** The LC-MS/MS chromatograms of BMAA, DAB and AEG standard detected by the HILIC direct analysis (A) and AQC derivatization method (B).
